# Supplementary material for: The Protective Role of Bacteroides fragilis in a Murine Model of Colitis-Associated Colorectal Cancer
Source: PubMed Central journal article supplement (PMC6236802; doi:10.1128/msphere.00587-18), 2018-11-14
Supplement: sph006182701sf1.pdf [file sph006182701sf1.pdf]

**A**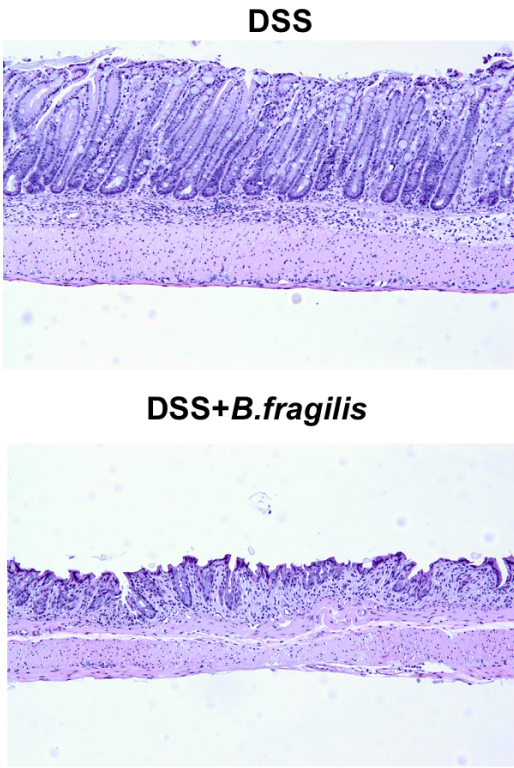**B**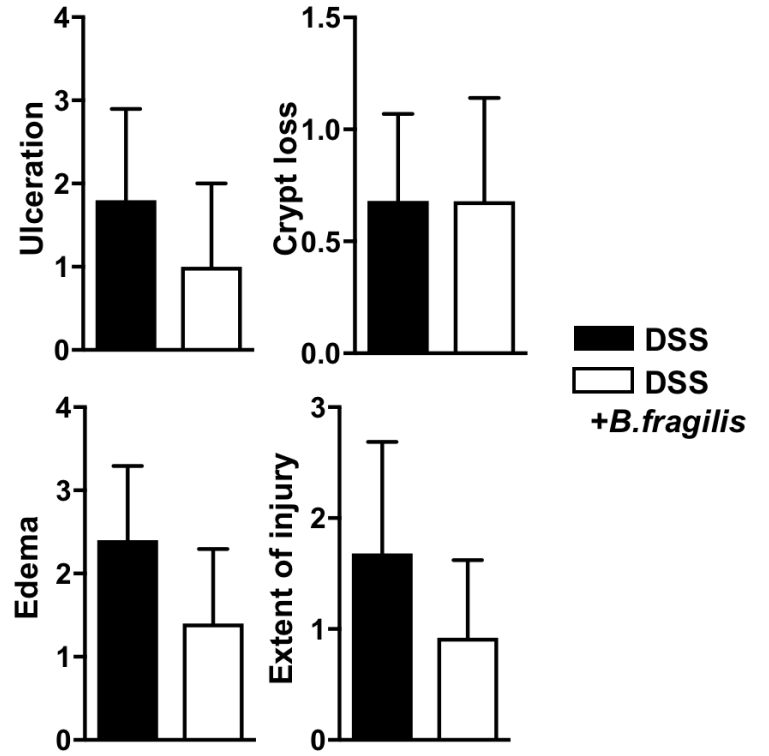**FIG S1**
